# Supplementary material for: Store-Operated Ca2+ Entry Is Up-Regulated in Tumour-Infiltrating Lymphocytes from Metastatic Colorectal Cancer Patients
Source: MDPI journal article supplement (doi:10.3390/cancers14143312), 2022-07-07
Supplement: s1 [file s1]

## Supplementary Material

CTT007

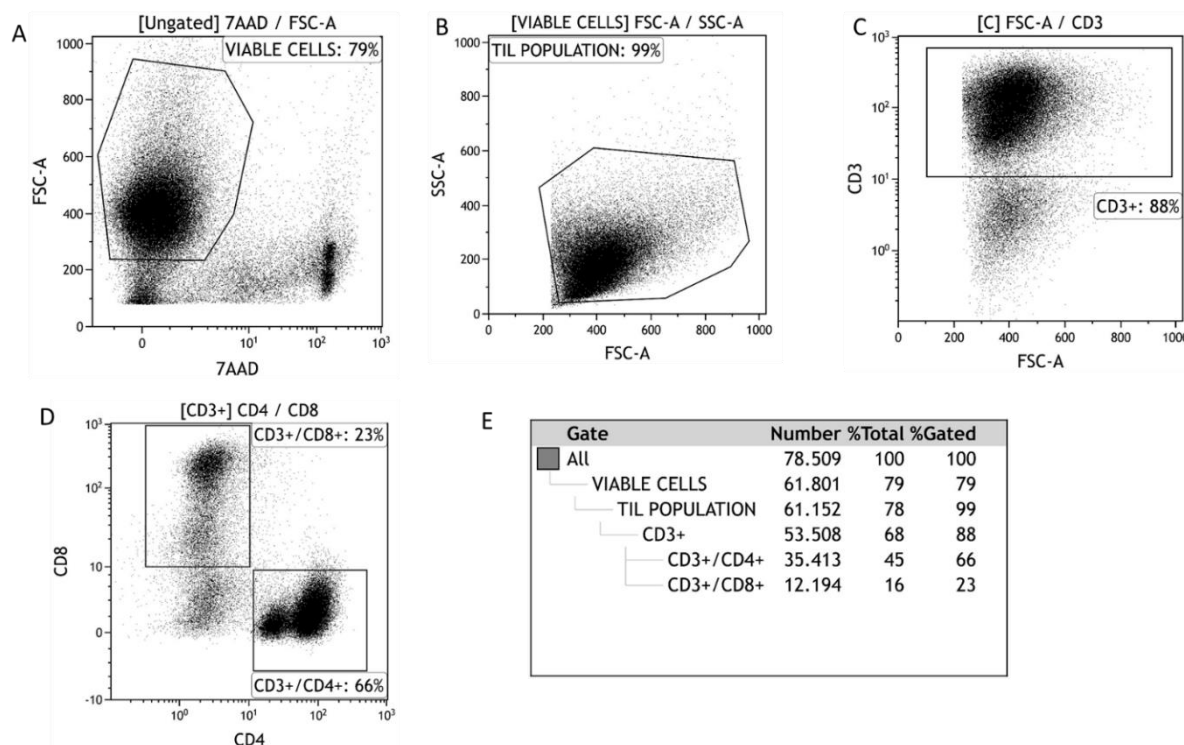

CMP019

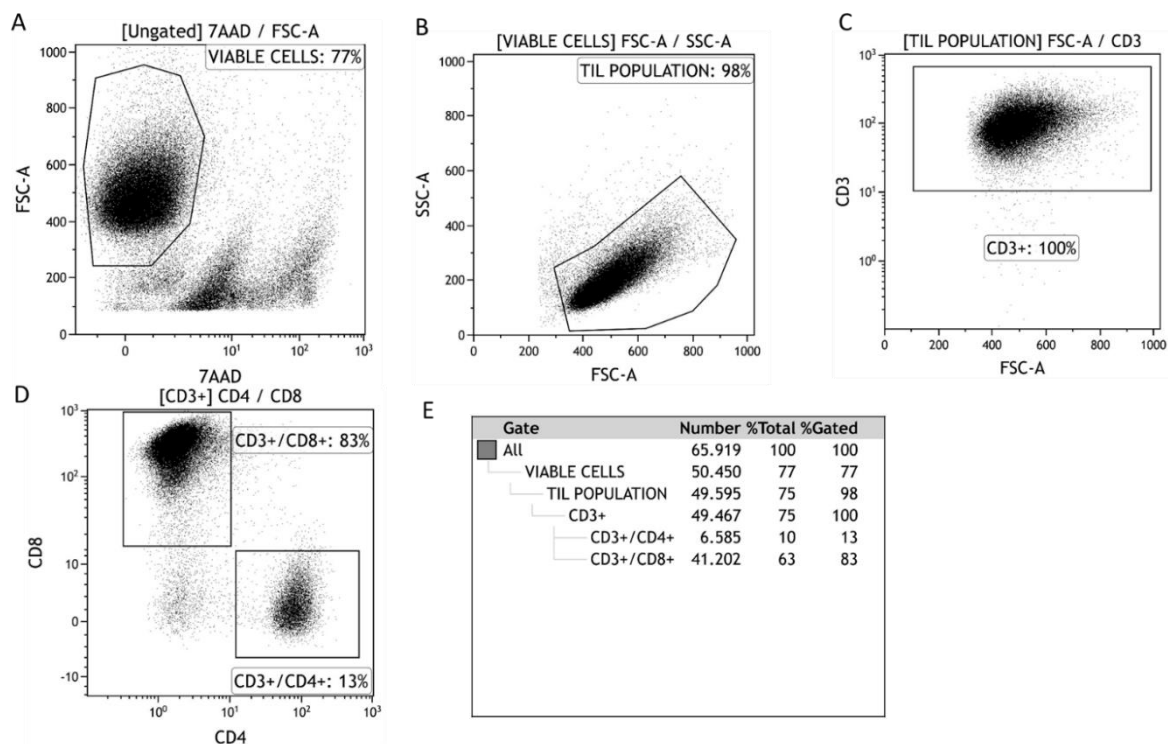

**Figure S1. Representative immunophenotype of TILs isolated from mCRC patients.** Dot plots of TILs derived from two representative patients (CTT007 and CMP019), in which we documented a preferential expansion of CD3+/CD4+ or CD3+/CD8+ cells, respectively, are shown. For each patient, the panels represent the gating strategy to evaluate TIL cell populations. Panel A shows the percentage of viable cells 7AAD- cells; panel B shows viable TIL cells gated based on physical parameters; panel C shows CD3+ cells present on viable TIL gated cells; panel D shows CD3+/CD4+ and CD3+/CD8+ cells on CD3+ viable TIL gated cells; panel E shows number of cells acquired and gated according to our strategy..

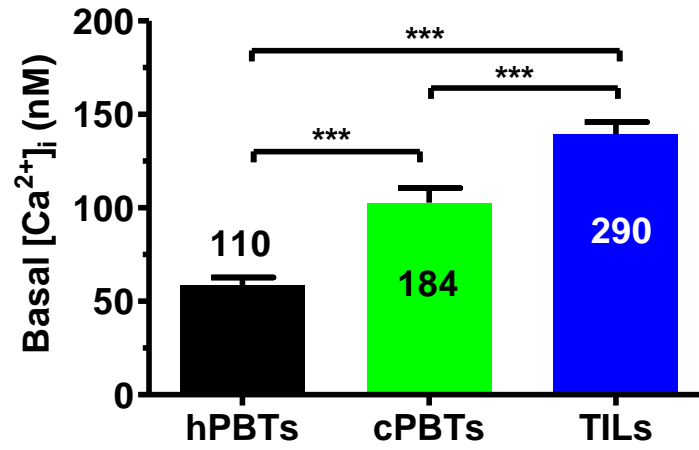

**Figure S2. Resting  $[Ca^{2+}]_i$  is higher in TILs than in hPBTs and cPBTs.** Resting  $[Ca^{2+}]_i$  in the three cell types was monitored by using the Grynkiewicz method, as described in [35]. One-way ANOVA followed by the post hoc Bonferroni test: \*\*\* $p < 0.001$ . The total number of analysed cells is indicated within the histogram bars.

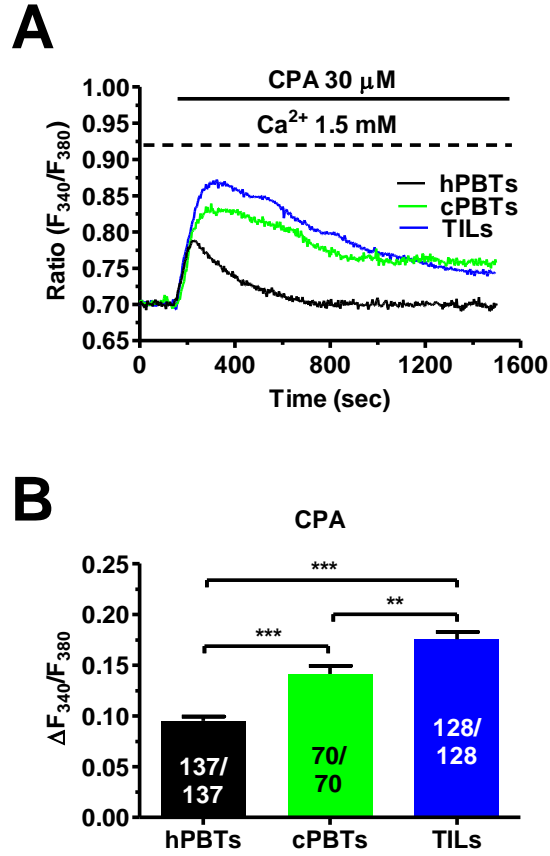

**Figure S3. The Ca<sup>2+</sup> response to CPA is larger in TILs compared to hPBTs and cPBTs.** A) Intracellular Ca<sup>2+</sup> signals evoked by 30  $\mu$ M CPA in the presence of 1.5 mM Ca<sup>2+</sup>. Under these conditions, CPA evokes both ER Ca<sup>2+</sup> release and SOCE activation. B) Mean  $\pm$  SE of the amplitude CPA-evoked intracellular Ca<sup>2+</sup> mobilisation. One-way ANOVA followed by the post hoc Bonferroni test: \*\* $p$  < 0.01 and \*\*\* $p$  < 0.001. The numbers within or above the histogram bars indicate the number of responding cells over the total number of analysed cells.

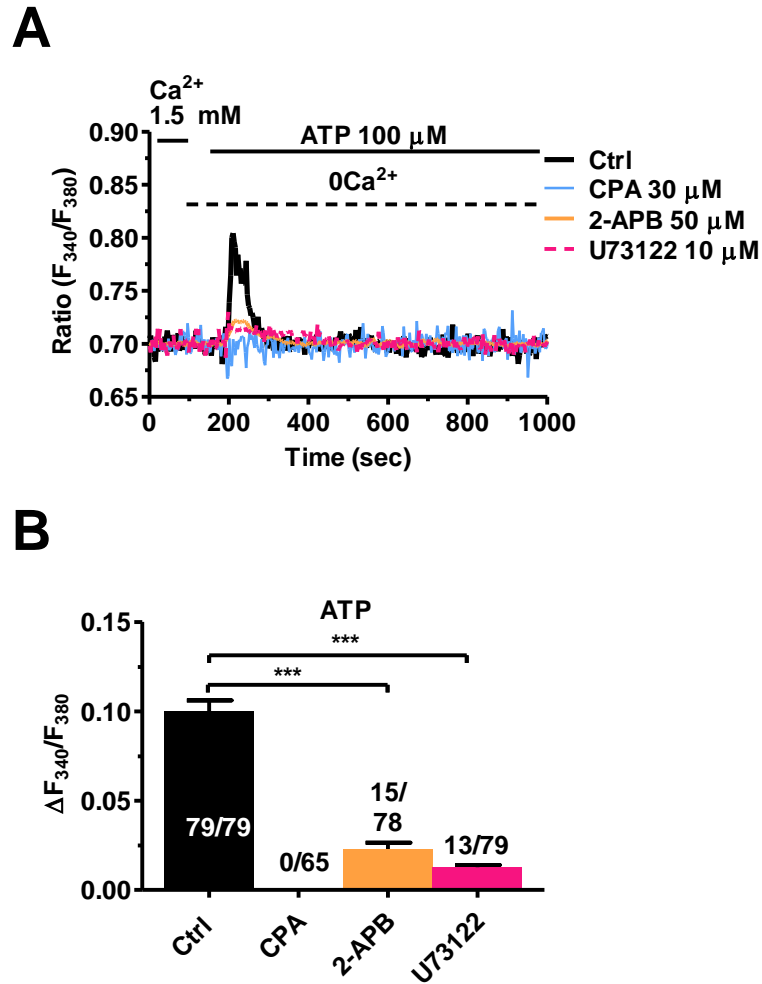

**Figure S4. Evidence that  $\text{InsP}_3\text{Rs}$  mediate ATP-evoked intracellular  $\text{Ca}^{2+}$  release in hPBTs.** A) Intracellular  $\text{Ca}^{2+}$  release was evoked by the  $\text{InsP}_3$ -producing autacoid, ATP (100  $\mu\text{M}$ ), in the absence (Ctrl) and presence of the following drugs: U73122 (10  $\mu\text{M}$ , 20 min), which inhibits basal  $\text{InsP}_3$  production by interfering with PLC activity; 2-APB (50  $\mu\text{M}$  30 min), which blocks  $\text{InsP}_3\text{Rs}$ ; and CPA (30  $\mu\text{M}$ , 20 min), which specifically depletes the ER  $\text{Ca}^{2+}$  content. B) Mean  $\pm$  SE of the amplitude ATP-evoked intracellular  $\text{Ca}^{2+}$  mobilisation under the designated treatments. One-way ANOVA followed by the post hoc Bonferroni test: \*\*\* $p < 0.001$ . The numbers within or above the histogram bars indicate the number of responding cells over the total number of analysed cells.

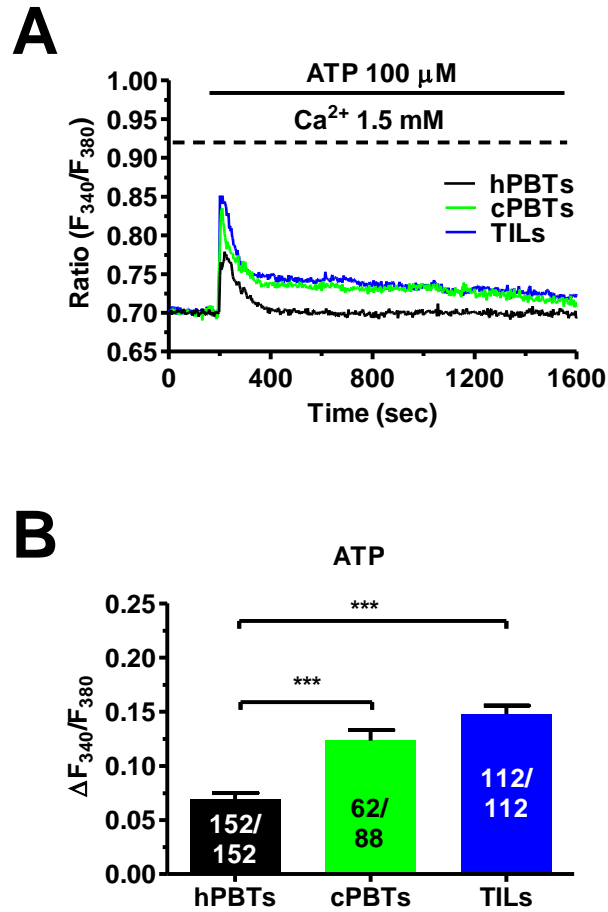

**Figure S5. The Ca<sup>2+</sup> response to ATP is larger in TILs than in hPBTs and cPBTs.** A) Intracellular Ca<sup>2+</sup> signals evoked by 100  $\mu$ M ATP in the presence of 1.5 mM Ca<sup>2+</sup>. Under these conditions, ATP evokes both ER Ca<sup>2+</sup> release and SOCE activation. B) Mean  $\pm$  SE of the amplitude ATP-evoked intracellular Ca<sup>2+</sup> mobilisation. One-way ANOVA followed by the post hoc Bonferroni test: \*\* $p < 0.01$  and \*\*\* $p < 0.001$ . The numbers within or above the histogram bars indicate the number of responding cells over the total number of analysed cells.

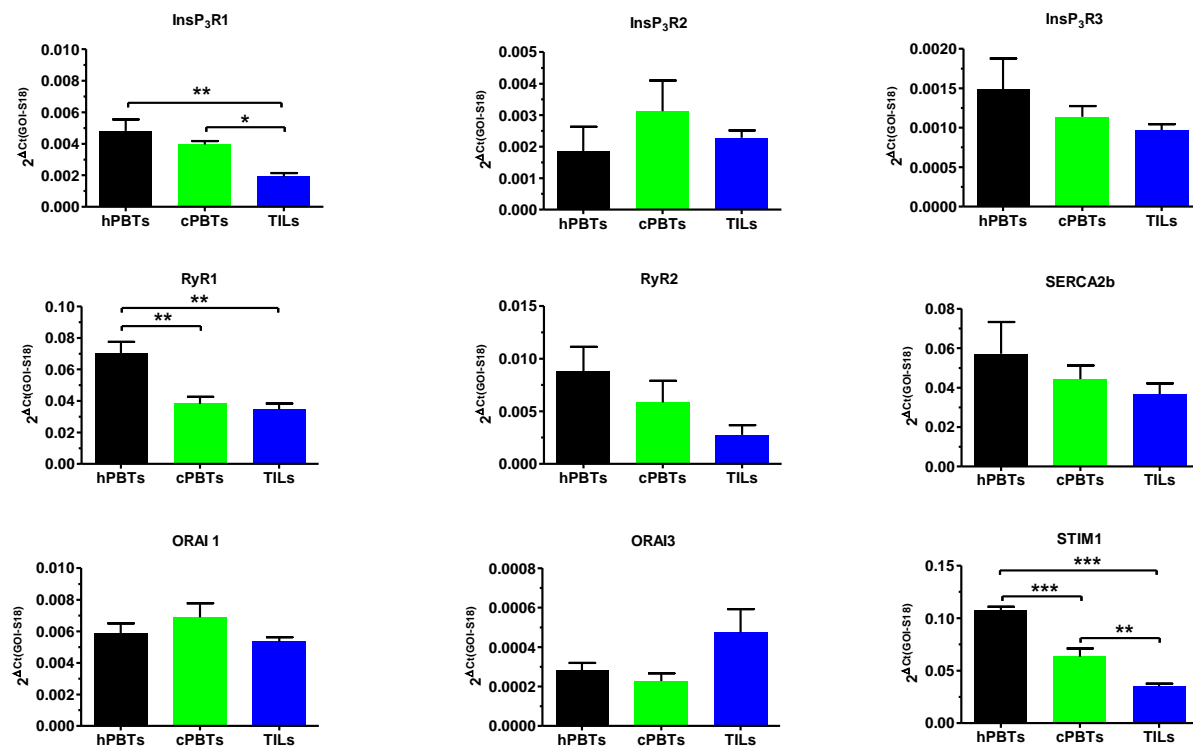

**Figure S6. Differential expression of the main component of the Ca<sup>2+</sup>-handling machinery in hPBTs, cPBTs and TILs.** Comparison of the mRNA levels of InsP<sub>3</sub>R1, InsP<sub>3</sub>R2, InsP<sub>3</sub>R3, RyR1, RyR2, SERCA2B, ORAI1, ORAI3 and STIM1 in hPBTs, cPBTs and TILs. Data are expressed as mean ± SE of three qPCR runs performed in triplicate using samples prepared from four healthy subjects (hPBTs) and four patients with mCRC (cPBTs and TILs). One-way ANOVA followed by the post hoc Bonferroni test: \**p* < 0.05, \*\**p* < 0.01, and \*\*\**p* < 0.001.

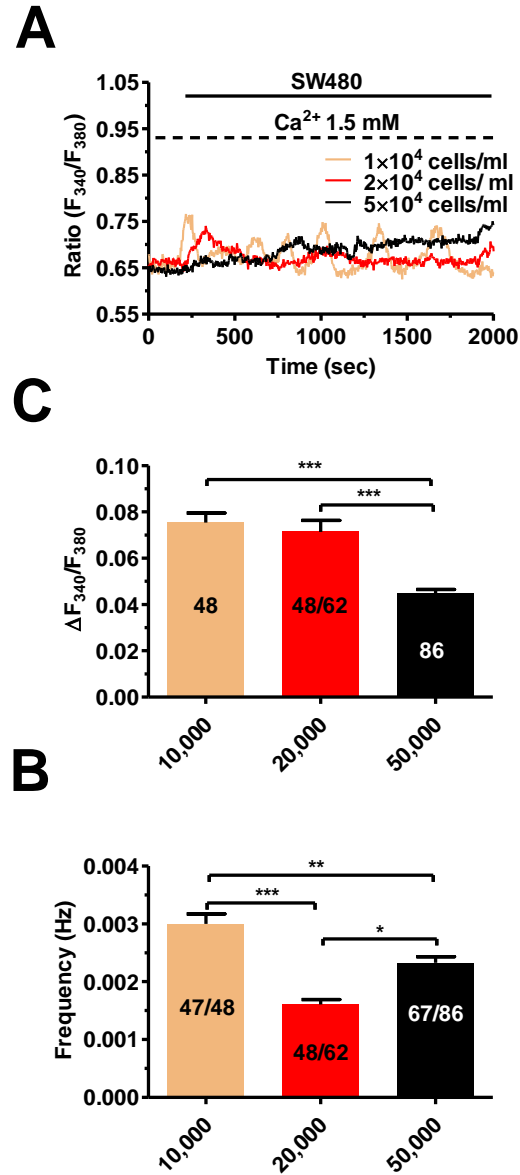

**Figure S7. Intracellular  $\text{Ca}^{2+}$  oscillations elicited by SW480 cells in TILs.** A) Intracellular  $\text{Ca}^{2+}$  oscillations evoked by TIL exposure to different doses of SW480 cells, which represent a widely employed immortalised mCRC cell line. B) Mean  $\pm$  SD of oscillation frequency in TILs challenged with different doses of SW480 cells. One-way ANOVA followed by the post hoc Bonferroni test: \*\*\* $p < 0.001$ . C) Mean  $\pm$  SD of the amplitude of the 1<sup>st</sup>  $\text{Ca}^{2+}$  spike in TILs challenged to different doses of SW480 cells. One-way ANOVA followed by the post hoc Bonferroni test: \* $p < 0.05$ , \*\* $p < 0.01$  and \*\*\* $p < 0.001$ . In panels B and C, the numbers within or above the histogram bars indicate the number of responding cells over the total number of analysed cells.

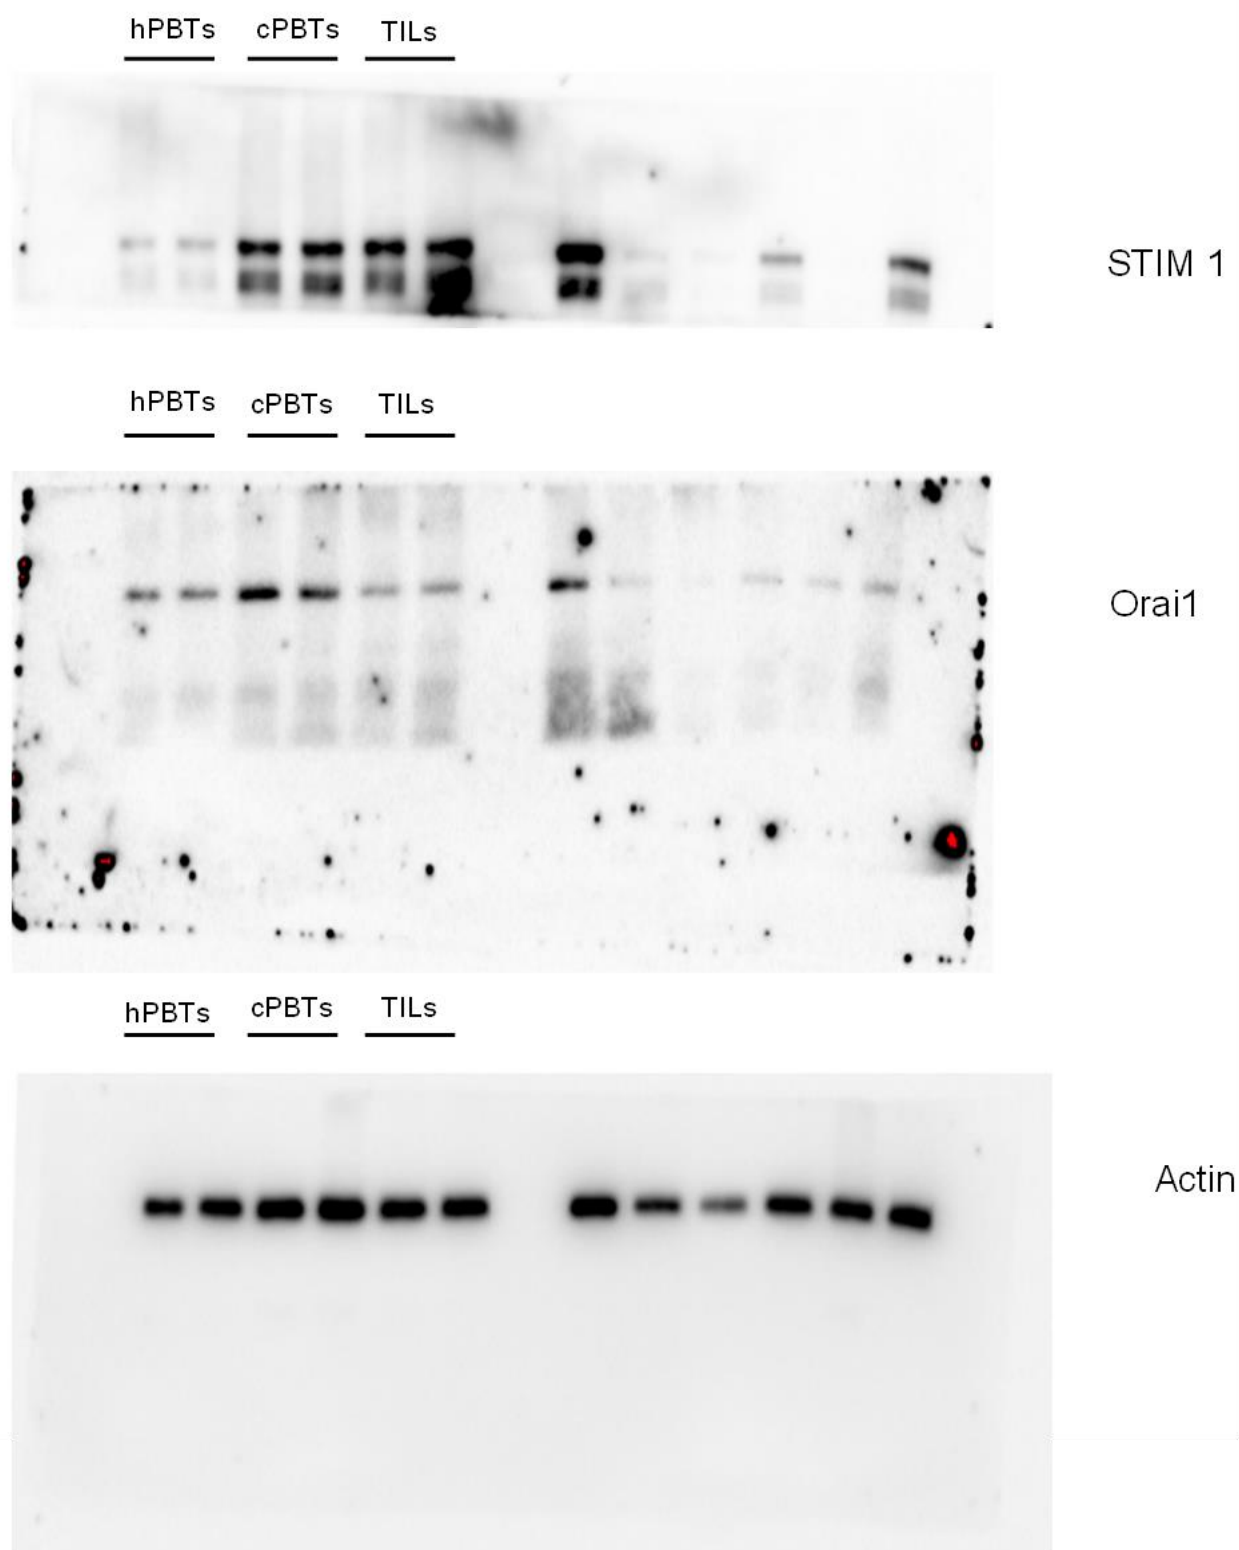

**Figure S8.** Whole Western blot showing all bands depicted in Figure 4B.



**Table S1.** Clinical characteristics of patients.

| <b>UPN</b> | <b>Age/sex</b> | <b>Disease</b> | <b>Source of tumour cells</b> | <b>Pathology</b>                        |
|------------|----------------|----------------|-------------------------------|-----------------------------------------|
| CTT007     | 78/F           | mCRC           | Liver metastasis*             | Adenocarcinoma (Cytokeratin 20+; CDX2+) |
| BNZ008     | 67/M           | mCRC           | Liver metastasis*             | Adenocarcinoma (Cytokeratin 20+; CDX2+) |
| NSL009     | 67/M           | mCRC           | Liver metastasis*             | Adenocarcinoma                          |
| FRV010     | 79/F           | mCRC           | Liver metastasis*             | Adenocarcinoma (Cytokeratin 20+; CDX2+) |
| MRN014     | 54/F           | mCRC           | Liver metastasis*             | Adenocarcinoma (Cytokeratin 20+; CDX2+) |
| PLT016     | 59/M           | mCRC           | Liver metastasis*             | Adenocarcinoma                          |
| GRN017     | 55/F           | mCRC           | Liver metastasis*             | Adenocarcinoma KRAS+                    |
| CMP019     | 75/M           | mCRC           | Liver metastasis*             | Adenocarcinoma (Cytokeratin 20+; CDX2+) |
| MRT020     | 49/M           | mCRC           | Liver metastasis*             | Adenocarcinoma (CDX2+)                  |
| DMR021     | 77/F           | mCRC           | Liver metastasis*             | Adenocarcinoma (CDX2+)                  |

Five males and five females affected by mCRC who underwent surgery for liver metastasis were included in the study. Among the patients initially enrolled, we included study patients from which we were able to obtain enough TILs and cPBTs to accomplish the aims of the study, after having set up the best methodological approach for the ex vivo expansion of the TILs. \* 80% tumour viability.

**Table S2.** List of oligonucleotide primers used for real-time PCR.

| Protein Name         | Gene Name            | Forward/reverse (5'→3')                         | Accession No. |
|----------------------|----------------------|-------------------------------------------------|---------------|
| S18                  | RPS18                | TGCGAGTACTCAACACCAACA<br>CTGCTTTCCTCAACACCACA   | NM_022551     |
| ORAI1                | ORAI1                | GACCTCGGCTCTGCTCTC<br>TGATCATGAGCGCAAACAGG      | NM_032790     |
| ORAI2                | ORAI2                | CCCTCCTCTCCGGCTTTG<br>TGATGAGGAGGGCGAACAG       | NM_001126340  |
| ORAI3                | ORAI3                | ACGTCTGCCTTGCTCTCG<br>ACCATGAGTGCAAAGAGGTG      | NM_152288     |
| STIM1                | STIM1                | GCCTCAGCCATAGTCACAGT<br>ATGTTACGGACTGCCTCGAA    | NM_001277961  |
| STIM2                | STIM2                | GACGGATGCGAGCTTGTG<br>AAGCATGGTGGACTCAGTGA      | NM_001169117  |
| InsP <sub>3</sub> R1 | ITPR1                | AAGAAGGGCAGAAGGAGGAC<br>TTCGTTGATGGCCAGGTATT    | NM_002222     |
| InsP <sub>3</sub> R2 | ITPR2                | AATGTGACCATGGGGATGAT<br>CGATCCTGGTTTGAGCATCT    | NM_002223     |
| InsP <sub>3</sub> R3 | ITPR3                | TTATGCAGTTTCGGGACCAC<br>TTGCCCTTGTA CTCTCGTCACA | NM_002224     |
| RyR1                 | RYR1                 | CTTCCTGGAGCCCACTAGC<br>CGTGTTAGCCAGCATCTCCT     | NM_000540     |
| RyR2                 | RYR2                 | CCGCAACCATCCACAAAGAA<br>AAGGTGCAGATGGAGAGGTC    | NM_001035     |
| RyR3                 | RYR3                 | CGCCACCATTTCATAAGGAGC<br>GGGCTCTGACAGATAGGGAC   | NM_001036     |
| SERCA2b              | ATP2A2,<br>variant b | AATGTGTAACGCCCTCAACA<br>GCAGGCTGCACACACTCTT     | NM_170665     |

**Table S3.** List of primary antibodies used to characterise the SOCE machinery.

| <b>Primary antibody</b> | <b>Dilution</b> | <b>Cat. N.</b> | <b>Source</b>   |
|-------------------------|-----------------|----------------|-----------------|
| Anti-STIM 1             | 1:500           | 4916           | Cell signalling |
| Anti-Orai1              | 1:500           | PA-74181       | Invitrogen      |
| Anti- $\beta$ -actin    | 1:2000          | A1978          | Sigma-Aldrich   |
